# Supplementary material
Source: MDPI journal article supplement (https://www.mdpi.com/2073-4441/13/20/2833)
Supplement: s1 [file s1]

## Supplementary Information

**Table S1:** Abbreviation of polymers.

| Polymer                                     | Abbreviation | Polymer                    | Abbreviation |
|---------------------------------------------|--------------|----------------------------|--------------|
| Polyamide                                   | PA           | polyhexadecyl methacrylate | PHM          |
| Polyacrylamide                              | PAM          | Polymethyl methacrylate    | PMMA         |
| Polycarbonate                               | PC           | Polyoctadecyl acrylate     | POA          |
| Polycaprolactone                            | PCL          | Polypropylene              | PP           |
| Polyethylene                                | PE           | Polyphenylene oxide        | PPO          |
| Polyethylene: ethyl acrylate                | PE:PEA       | Polystyrene                | PS           |
| Polyethylene: propylene                     | PE:PP        | Polysulfide rubber         | PSR          |
| Polyethylene: vinyl acetate: vinyl chloride | PE:PVA:PVC   | polytetrafluoroethylene    | PTFE         |
| Polyethyl methacrylate                      | PEMA         | Polyurethane               | PU           |
| Polyester                                   | PEST         | Polyvinyl chloride         | PVC          |
| Polyethylene terephthalate                  | PET          | Polyvinyl stearate         | PVS          |
| Polyamide                                   | PA           | polyhexadecyl methacrylate | PHM          |

**Table S2:** Properties of sludge collected from a community WSP.

| Sampling date | Moisture content | Organic matter content |
|---------------|------------------|------------------------|
| 7 Aug. 2020   | 22.2 ± 4.4 %     | 2.2 ± 0.2 %            |
| 12 Dec. 2020  | 25.6 ± 1.6 %     | 1.5 ± 0.1 %            |
| 6 Sep. 2021   | 43.4 ± 1.4 %     | 2.4 ± 0.03 %           |

**Table S3:** Changes in mass of the tested plastic particles following wet peroxidation treatment.

| Polymer types | Color         | Numbers | Pretreatment weight (g) | Post-treatment weight (g) | Mass change (%) |
|---------------|---------------|---------|-------------------------|---------------------------|-----------------|
| PETG          | Green         | 10      | 0.1262                  | 0.1260                    | 0.16            |
| PLA           | Orange        | 10      | 0.1698                  | 0.1694                    | 0.24            |
| CPE           | Blue          | 10      | 0.1601                  | 0.1601                    | 0.00            |
| ABS           | Red           | 10      | 0.1631                  | 0.1623                    | 0.49            |
| PETG          | Green (Fiber) | 20      | 0.0142                  | 0.0141                    | 0.71            |

**Table S4:** Recovery of 500-1000 µm of microplastics spiked into lagoon wastewater and final effluent.

| Polymer types | Sample item       | Spiked number | Detected number | Recovery (%) | Average recovery (%) |
|---------------|-------------------|---------------|-----------------|--------------|----------------------|
| Virgin PMMA   | Lagoon wastewater | 15            | 14              | 93.3         | 93.3                 |
|               | Treated effluent  | 15            | 14              | 93.3         |                      |
| Virgin PP     | Lagoon wastewater | 15            | 12              | 80.0         | 83.3                 |
|               | Treated effluent  | 15            | 13              | 86.7         |                      |
| Weathered PP  | Lagoon wastewater | 15            | 9               | 60.0         | 60.0                 |
|               | Treated effluent  | 15            | 9               | 60.0         |                      |

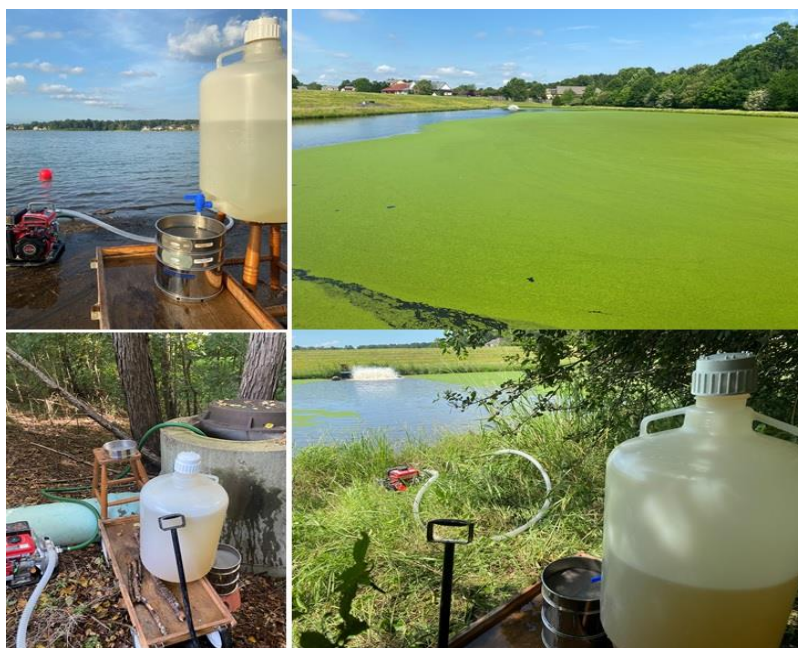

**Figure S1.** Photos showing our sampling scheme and sampling sites at Wellsgate Lake (top left), the waste stabilization pond effluent (bottom left), and the waste stabilization pond itself (top and bottom right). Note the 50 L carboy emptying through a stack of sieves with mesh sizes of 1 mm, 125  $\mu\text{m}$ , and 45  $\mu\text{m}$  and the extensive surface duckweed in the pond. The water transfer pump and intake (just below the buoy in the top left) are also shown.

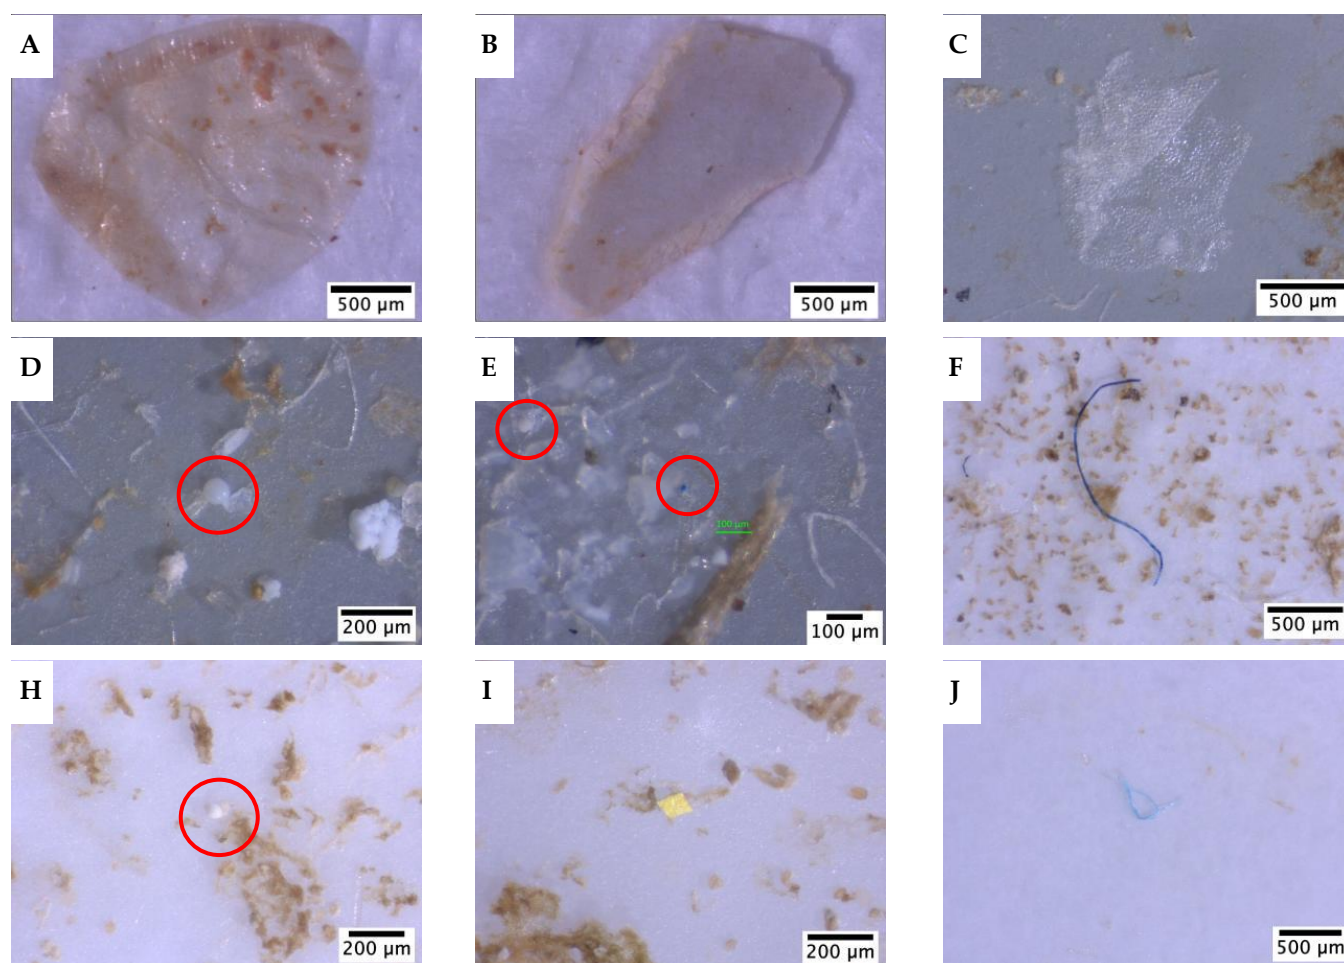

**Figure S2:** Stereomicrograph of representative microplastics isolated from samples. (A) transparent fragment and (B) white fragment extracted from Wellsgate lake, (C) transparent fragment extracted from pond, (D) white microbead and (E) blue microbead extracted from effluent, (F) blue fiber, (G) white microbead and (H) yellow fragment extracted from duckweed, (I) blue fiber extracted from sludge.

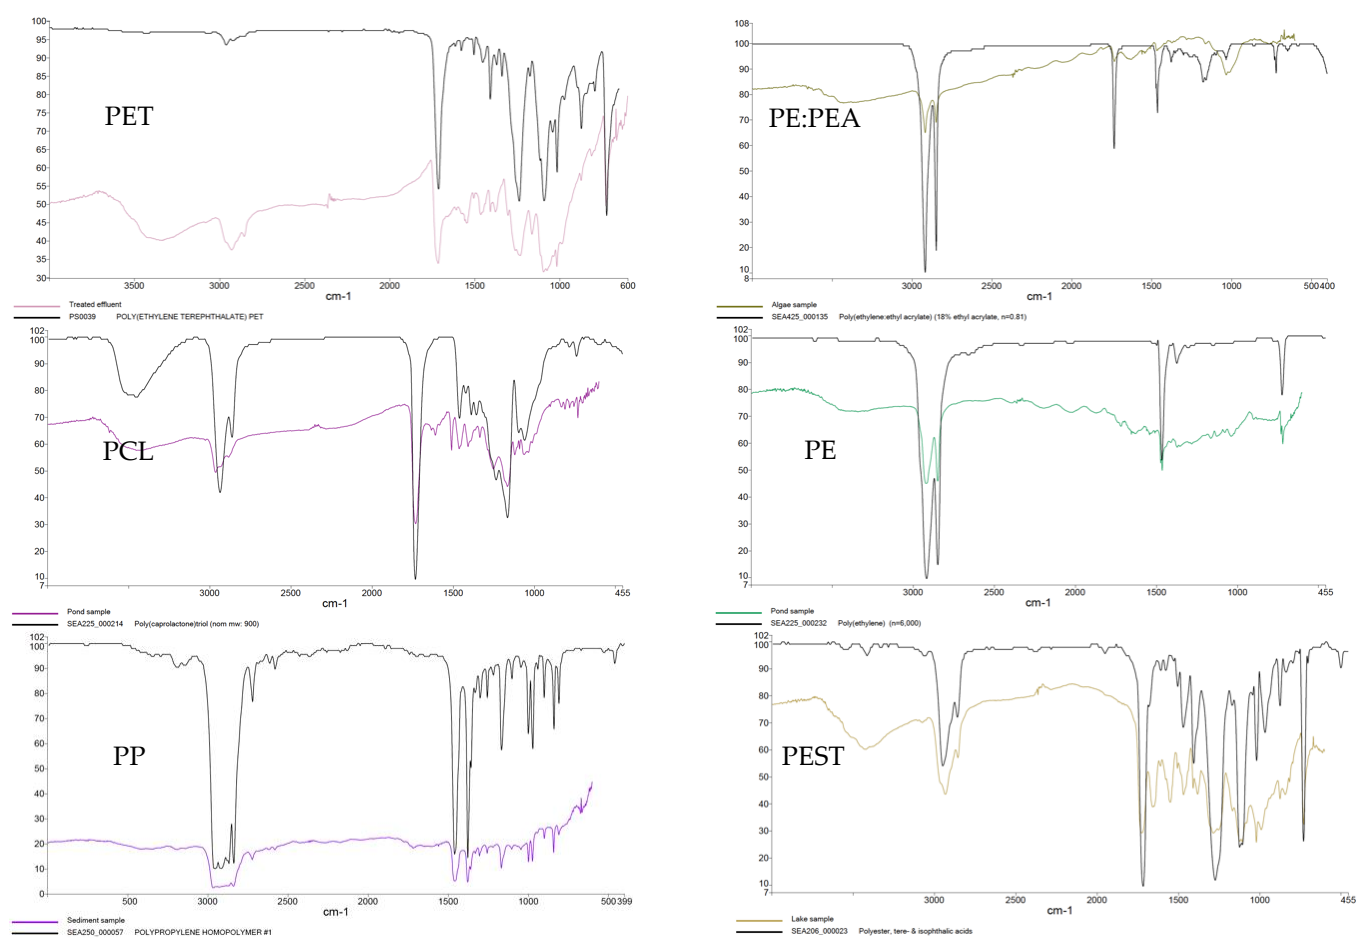

**Figure S3:** Some spectrum of extracted MPs.

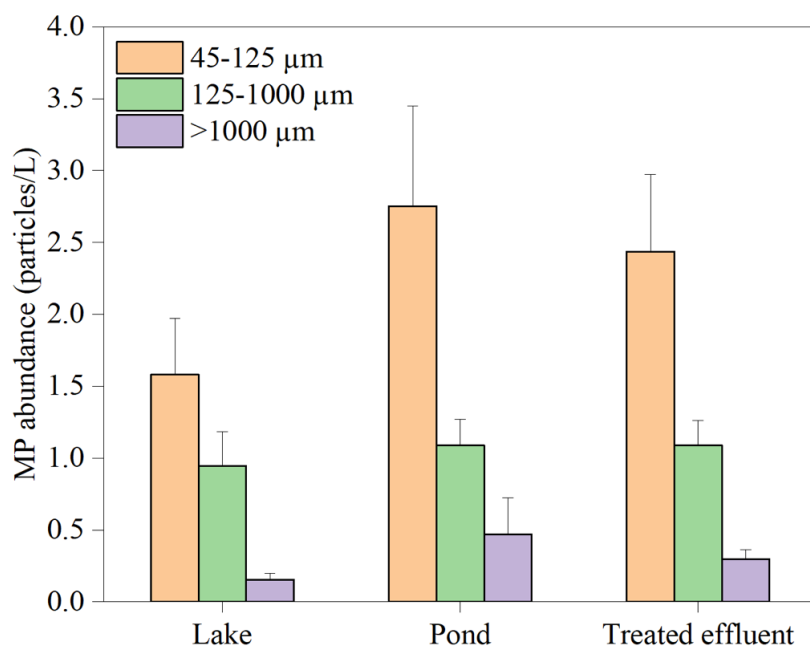

**Figure S4:** Size distribution of microplastics extracted from Wellsgate lake, the pond, and treated effluent.

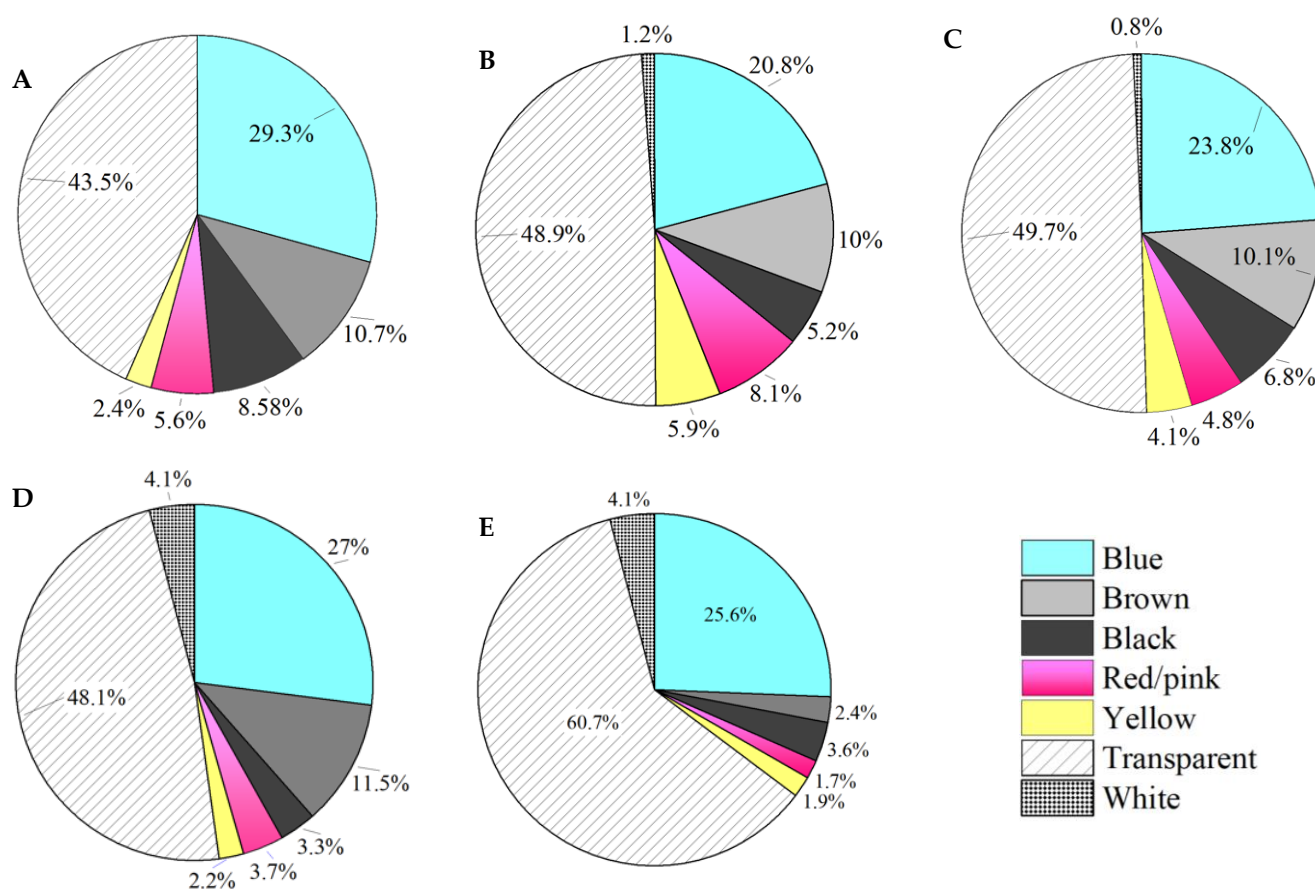

**Figure S5:** Color distribution of microplastics extracted from (A) Wellsgate lake, (B) the pond, (C) treated effluent, (D) sludge, and (E) duckweed.
